# Supplementary material
Source: Royal Society of Chemistry journal article supplement (doi:10.1039/d5nr05371d)
Supplement: d5nr05371d1.pdf [file d5nr05371d1.pdf]

## Supporting Information

### **Wastewater to hydrogen: iron-nickel electrocatalysts fabricated by a green synthesis achieving industrial current densities**

Thomas Karagiannis,<sup>a</sup> Eamonn Devlin,<sup>b</sup> Aran Rafferty,<sup>c</sup> Raman Bekarevich,<sup>d</sup> Vasileios Psycharis,<sup>b</sup> Vasileios Tzitzios,<sup>a,b</sup> Aphrodite Tomou,<sup>c</sup> Rocco Villano,<sup>f</sup> Leila Negahdar<sup>f</sup> and M. Veronica Sofianos<sup>\*a</sup>

<sup>a</sup>*School of Chemical and Bioprocess Engineering, University College Dublin, Belfield, Dublin 4, Ireland*

<sup>b</sup>*Institute of Nanoscience and Nanotechnology, N.C.S.R. Demokritos, 15341 Agia Paraskevi, Athens, Greece*

<sup>c</sup>*AMBER Research Centre, Naughton Institute, Trinity College Dublin, Dublin 2, D02PN40, Ireland*

<sup>d</sup>*Advanced Microscopy Laboratory, Centre for Research on Adaptive Nanostructures and Nanodevices (CRANN), Trinity College Dublin, Dublin 2, Ireland*

<sup>e</sup>*Goodfellow, Ermine Business Park, Huntingdon, Cambs, PE29 6WR England*

<sup>f</sup>*School of Chemistry, University College Dublin, Belfield, Dublin 4, Ireland*

<sup>\*</sup>*email address: [mvs Sofianos@gmail.com](mailto:mvs Sofianos@gmail.com) (M. V. Sofianos)*

**Table S1.** Average catalyst loading after the second consecutive synthesis.

| Sample    | Catalyst loading<br>(mg/cm <sup>2</sup> ) |
|-----------|-------------------------------------------|
| FeNiB@NF  | 5.4                                       |
| FeNiBP@NF | 3.7                                       |
| FeNiP@NF  | 3.1                                       |

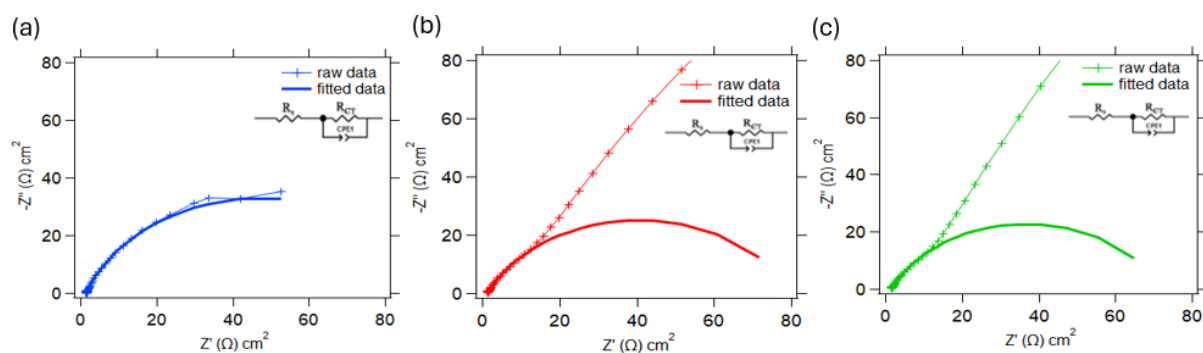

**Fig. S1.** Nyquist plots of EIS data normalized to geometric surface area for FeNiB@NF (a), FeNiBP@NF (b), and FeNiP@NF (c) in 1 M KOH (inset displays the equivalent circuit).

**Table S2.** Resistance values normalized to the geometric surface area of the supported electrocatalysts in 1 M KOH, derived from Nyquist plot fitting of EIS data.

| Sample    | $R_s$ ( $\Omega$ cm <sup>2</sup> ) | Charge transfer resistance ( $\Omega$ cm <sup>2</sup> ) | CPE Y0 (F cm <sup>2</sup> ) |
|-----------|------------------------------------|---------------------------------------------------------|-----------------------------|
| FeNiB@NF  | 1.14                               | 92.43                                                   | $4.4 \times 10^{-3}$        |
| FeNiBP@NF | 1.04                               | 79.33                                                   | $1.76 \times 10^{-4}$       |
| FeNiP@NF  | 1.43                               | 70.61                                                   | $1.91 \times 10^{-4}$       |

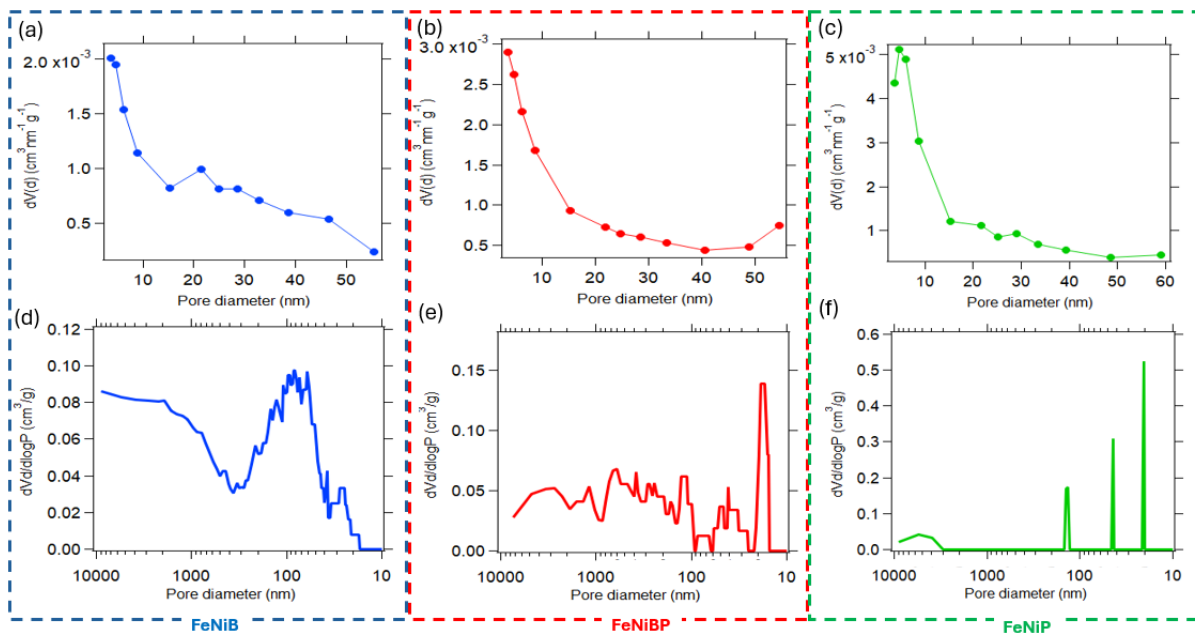

**Fig. S2.** BJH pore size distributions for FeNiB@NF (a), FeNiBP@NF (b) and FeNiP@NF (c). And pore size distributions (obtained from mercury porosimetry) for FeNiB@NF (d), FeNiBP@NF (e) and FeNiP@NF (f).

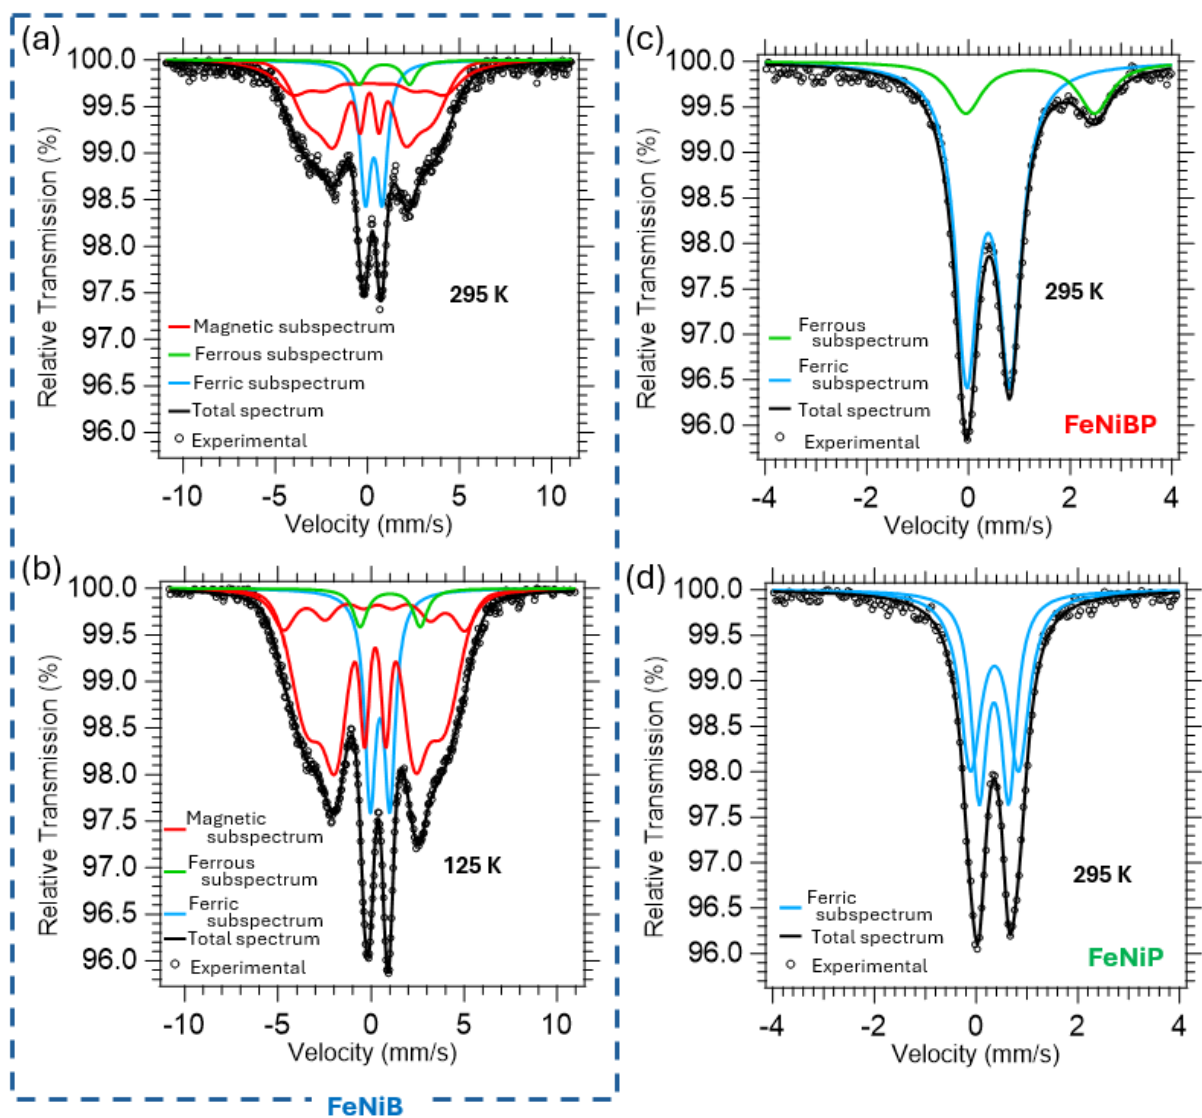

**Fig. S3.**  $^{57}\text{Fe}$  Mössbauer spectra of FeNiB at 295 K (a) and 125 K (b), FeNiBP (c) and FeNiP (d) at 295 K.

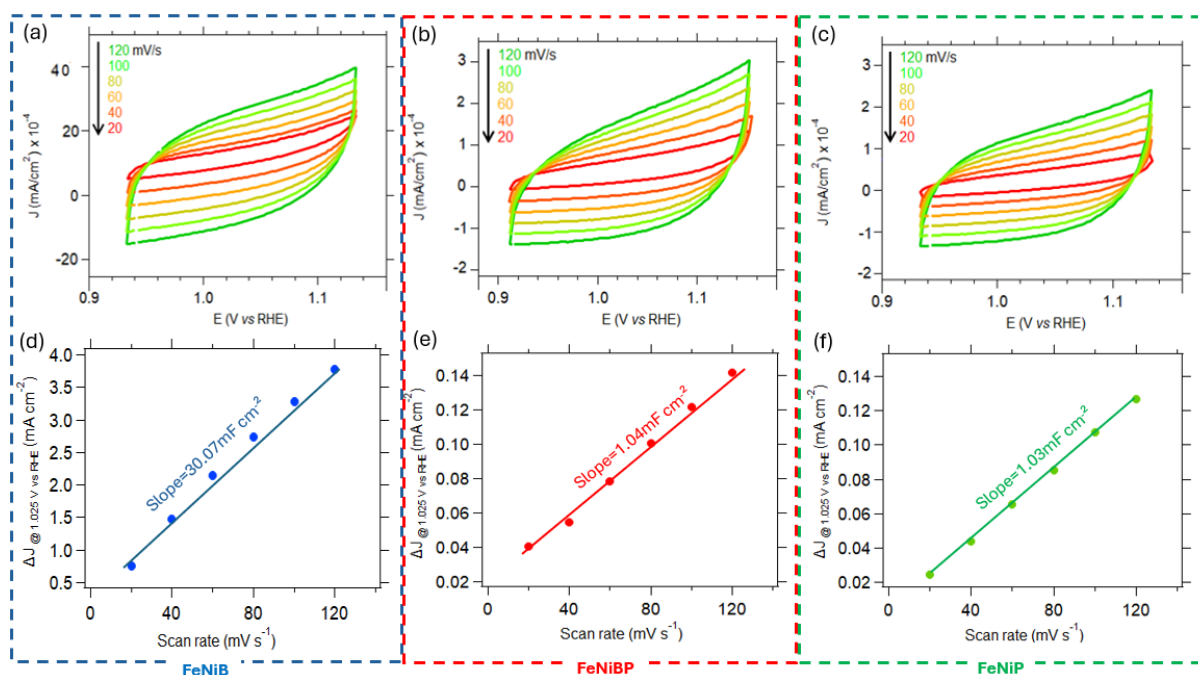

**Figure S4.** Cyclic voltammetry was conducted in the non-Faradaic region (0.88–1.17 V vs RHE) for FeNiB@NF (a), FeNiBP@NF (b) and FeNiP@NF (c). Scan rates of 120, 100, 80, 60, 40, and 20  $\text{mV s}^{-1}$  were applied to record current densities and determine the double-layer capacitance ( $C_{dl}$ ). The  $C_{dl}$  values were extracted from the slopes of the current density versus scan rate plots for FeNiB@NF (d), FeNiBP@NF (e) and FeNiP@NF (f).

**Table S4.** Determined double layer capacitance and electrochemical surface area.

| Sample    | $C_{dl}$ ( $\text{mF/cm}^2$ ) | ECSA ( $\text{cm}^2$ ) |
|-----------|-------------------------------|------------------------|
| FeNiB@NF  | 15.08                         | 377.2                  |
| FeNiBP@NF | 0.52                          | 13.1                   |
| FeNiP@NF  | 0.51                          | 12.9                   |

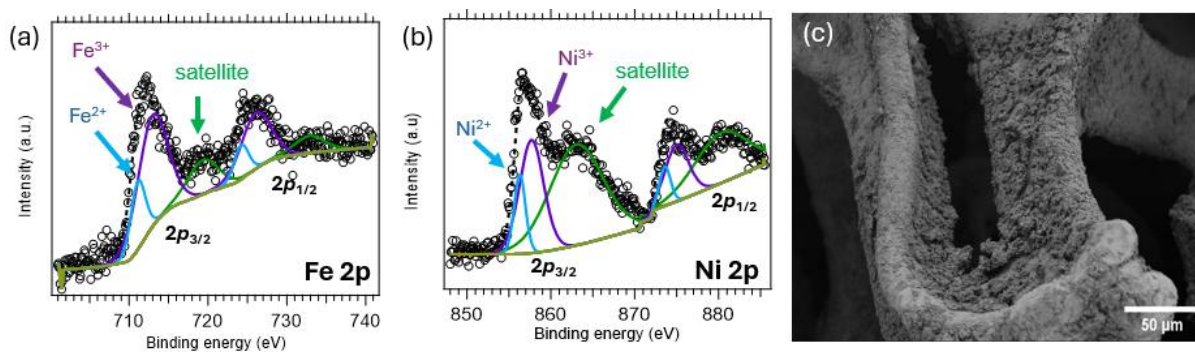

**Fig. S5.** High-resolution XPS spectra of Fe 2p (a), Ni 2p (b) and SEM image (c) of FeNiB@NF collected after 24 h HER chronoamperometry in 1 M KOH.

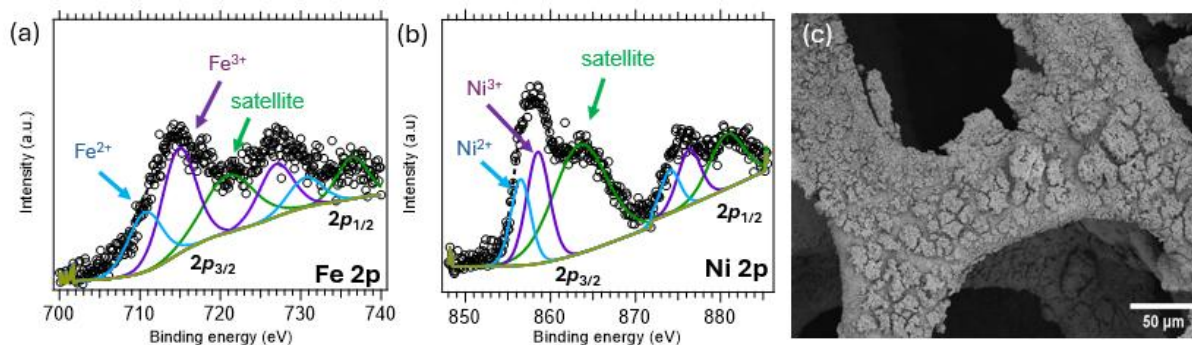

**Fig. S6.** High-resolution XPS spectra of Fe 2p (a), Ni 2p (b) and SEM image (c) of FeNiBP@NF collected after 24 h OER chronoamperometry in 1 M KOH.

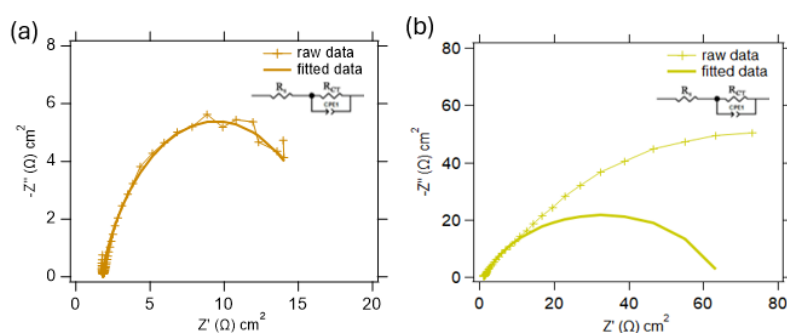

**Fig. S7.** Nyquist plot obtained from normalized by geometrical surface area EIS for FeNiB@NF (a), FeNiBP@NF (b) in 1 M KOH + 0.33 M NH<sub>3</sub> and the inset shows the equivalent circuit.

**Table S5.** Representing the resistance values normalized by geometrical surface area for the supported electrocatalysts in 1 M KOH + 0.33 M NH<sub>3</sub> obtained by fitting the EIS data from Nyquist plots.

| Sample    | $R_s$ ( $\Omega$ cm <sup>2</sup> ) | Charge transfer resistance ( $\Omega$ cm <sup>2</sup> ) | CPE Y0 (F cm <sup>2</sup> ) |
|-----------|------------------------------------|---------------------------------------------------------|-----------------------------|
| FeNiBP@NF | 1.15                               | 63.42                                                   | $1.6 \times 10^{-4}$        |
| FeNiB@NF  | 1.71                               | 15.5                                                    | $18.4 \times 10^{-4}$       |

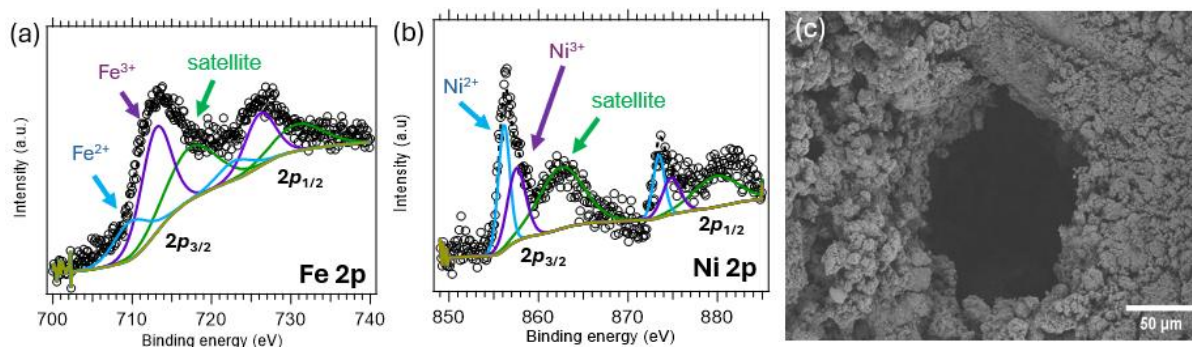

**Fig. S8.** High-resolution XPS spectra of Fe 2p (a), Ni 2p (b) and SEM image (c) of FeNiB@NF collected after 24 h HER chronoamperometry in 1 M KOH + 0.33 M NH<sub>3</sub>.

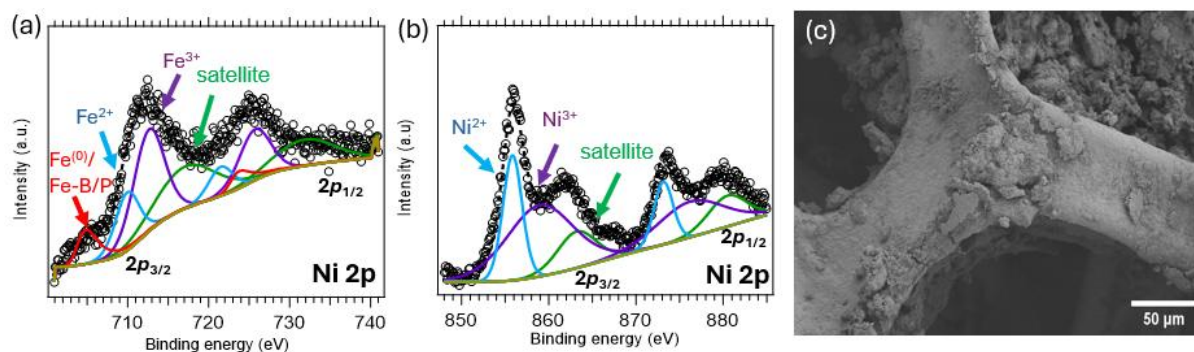

**Fig. S9.** High-resolution XPS spectra of Fe 2p (a), Ni 2p (b) and SEM image (c) of FeNiBP@NF collected after 24 h AOR chronoamperometry in 1 M KOH + 0.33 M NH<sub>3</sub>.

**Table S6.** Electrocatalysts valence states XPS 2p spectra area percentages before and after chronoamperometry experiments.

| Electrocatalyst  | Valence State      | Spectra area (%) before CA | CA 24h                           | Spectra area (%) after CA |
|------------------|--------------------|----------------------------|----------------------------------|---------------------------|
| FeNiB            | Fe (near-metallic) | 25.3                       | HER                              | 0                         |
|                  | Fe <sup>2+</sup>   | 37.8                       |                                  | 28.6                      |
|                  | Fe <sup>3+</sup>   | 36.9                       |                                  | 1 M KOH                   |
|                  | Ni <sup>(0)</sup>  | 38.3                       | 1 M KOH + 0.33 M NH <sub>3</sub> | 0                         |
|                  | Ni <sup>2+</sup>   | 61.7                       |                                  | 24.7                      |
|                  | Ni <sup>3+</sup>   | 0                          |                                  | 75.3                      |
|                  | FeNiB              | Fe (near-metallic)         | 25.3                             | OER                       |
| Fe <sup>2+</sup> |                    | 37.8                       | 23.1                             |                           |
| Fe <sup>3+</sup> |                    | 36.9                       | 76.9                             |                           |
| Ni <sup>2+</sup> |                    | 28.6                       | 39.9                             |                           |
| Ni <sup>3+</sup> |                    | 71.4                       | 60.1                             |                           |
| FeNiBP           | Fe <sup>(0)</sup>  | 0                          | AOR                              | 15.7                      |
|                  | Fe <sup>2+</sup>   | 20.8                       |                                  | 25.9                      |
|                  | Fe <sup>3+</sup>   | 79.2                       |                                  | 58.5                      |
|                  | Ni <sup>2+</sup>   | 28.6                       |                                  | 33.6                      |
|                  | Ni <sup>3+</sup>   | 71.4                       |                                  | 66.4                      |

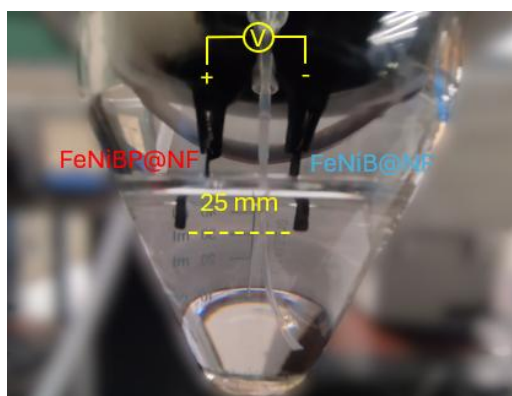

**Fig. S10.** Two electrode cell picture.

Overpotential (mV) Current density (mA cm<sup>-2</sup>) Tafel slope (mV dec<sup>-1</sup>) Stability test, i-t and/or Vt (h) Ref.

**Table S7.** Performance comparison of FeNiB@NF in HER and FeNiBP@NF in OER in 1 M KOH electrolyte.

| Electrocatalyst                                           | HER                                          |                                     | OER                                          |                                     | Ref       |
|-----------------------------------------------------------|----------------------------------------------|-------------------------------------|----------------------------------------------|-------------------------------------|-----------|
|                                                           | $\eta_{100}$ (mV)                            | Tafel slope (mV dec <sup>-1</sup> ) | $\eta_{100}$ (mV)                            | Tafel slope (mV dec <sup>-1</sup> ) |           |
| NiFe LDHs–NiFe alloy/CC                                   | 143                                          | 113.22                              | 276                                          | 64.29                               | 1         |
| Mo-Ni <sub>2</sub> P/Fe <sub>x</sub> P-V/NFF              | 247 ( $\eta_{300}$ )                         | 99.4                                | 282 ( $\eta_{300}$ )                         | 71.6                                | 2         |
| Fe-Ni <sub>3</sub> S <sub>2</sub> /Ni <sub>2</sub> P / NF | 198                                          | 87                                  | 357                                          | 67                                  | 3         |
| (S, P)-NiFe LDH / NIF                                     | 221                                          | 235.7                               | 272                                          | 102.7                               | 4         |
| Ni/NF                                                     | 177                                          | 53.47                               | -                                            | -                                   |           |
| FeOOH/Ni/NF                                               | -                                            | -                                   | 246                                          | 25.92                               | 5         |
| Ni <sub>2</sub> P@Fe <sub>2</sub> P/NF                    | 236 ( $\eta_{300}$ )                         | 107                                 | 290 ( $\eta_{300}$ )                         | 85                                  | 6         |
| Ni <sub>2</sub> P-NiFeBP/NF                               | 78                                           | 107.3                               | 248                                          | 31                                  | 7         |
| B-FeNiCoP/NF                                              | 185.5                                        | 58.3                                | 301.8                                        | 69.5                                | 8         |
| FeNiB@NF                                                  | 260 ( $\eta_{100}$ )<br>520 ( $\eta_{300}$ ) | 257.6                               | 360 ( $\eta_{100}$ )<br>550 ( $\eta_{300}$ ) | 274.5                               |           |
| FeNiBP@NF                                                 | 440 ( $\eta_{100}$ )<br>640 ( $\eta_{300}$ ) | 114.2                               | 370 ( $\eta_{100}$ )<br>540 ( $\eta_{300}$ ) | 51.6                                | This work |

## References

- 1 Y. Chen, J. Li, T. Liu, S. You, P. Liu, F. Li, M. Gao, S. Chen and F. Zhang, *Rare Metals*, 2023, **42**, 2272–2283.
- 2 X. Xu, K. Guo, J. Sun, X. Yu, X. Miao, W. Lu and L. Jiao, *Adv Funct Materials*, 2024, **34**, 2400397.
- 3 X. Wang, X. Yu, J. Bai, G. Yuan, P. He, Y. Zhu, S. Wu, F. Qin and L. Ren, *Electrochimica Acta*, 2023, **458**, 142524.
- 4 G. Yang, W. Peng, J. Ye, R. Hu, Q. Han, S. Li and B. Yuan, *Journal of Alloys and Compounds*, 2025, **1017**, 179074.
- 5 K. Zhang, F. Wang, X. Li, S. Wang, Y. Wang, Q. Zha and Y. Ni, *Journal of Alloys and Compounds*, 2023, **942**, 169014.
- 6 H. Xu, R. Yang, Z. Su, J. Zhang, J. Yang, L. Jing and Z. Dai, *Fuel*, 2026, **419**, 138853.
- 7 G.-L. Li, F. Deng, T.-G. Ma, Y.-H. Shi, J. Liu, Y. Yan, Q. Mao and J. Bao, *Chemical Engineering Journal*, 2025, **505**, 159290.
- 8 Q. Cao, W. Su, H. Liu, Q. Zhou and C. Feng, *Journal of Alloys and Compounds*, 2024, **1005**, 175893.
